# Supplementary material for: Acidification suppresses the natural capacity of soil microbiome to fight pathogenic Fusarium infections
Source: Springer Nature journal article supplement (doi:10.1038/s41467-023-40810-z), 2023-08-22
Supplement: MOESM1 [file 41467_2023_40810_MOESM1_ESM.pdf]

1    **Acidification suppresses the natural capacity of soil microbiome to fight pathogenic**  
2    ***Fusarium* infections**

3    Xiaogang Li<sup>1,3,#</sup>, Dele Chen<sup>2,4,#</sup>, Víctor J. Carrión<sup>5</sup>, Daniel Revillini<sup>6</sup>, Shan Yin<sup>4</sup>, Yuanhua  
4    Dong<sup>2</sup>, Taolin Zhang<sup>2</sup>, Xingxiang Wang<sup>2,7\*</sup>, Manuel Delgado-Baquerizo<sup>6\*</sup>

5    <sup>1</sup>State Key Laboratory of Tree Genetics and Breeding, Nanjing Forestry University,  
6    Nanjing 210037, China

7    <sup>2</sup>Key Laboratory of Soil Environment and Pollution Remediation, Institute of Soil  
8    Science, Chinese Academy of Sciences, Nanjing 210008, China

9    <sup>3</sup>Co-Innovation Center for Sustainable Forestry in Southern China, Nanjing Forestry  
10    University, Nanjing, China

11    <sup>4</sup>School of Agriculture and Biology, Shanghai Jiao Tong University, Shanghai Yangtze  
12    River Delta Eco-Environmental Change and Management Observation and Research  
13    Station, Ministry of Science and Technology, Shanghai 200240, China

14    <sup>5</sup>Microbial Biotechnology, Institute of Biology, Leiden University, Leiden, the  
15    Netherlands

16    <sup>6</sup>Laboratorio de Biodiversidad y Funcionamiento Ecosistémico, Instituto de Recursos  
17    Naturales y Agrobiología de Sevilla (IRNAS), CSIC, Sevilla, Spain

18    <sup>7</sup>Ecological Experimental Station of Red Soil, Chinese Academy of Sciences, Yingtan  
19    335211, China

20    #These authors contributed equally to this work.

21    **\*Corresponding authors**

22    E-mail address: [xxwang@issas.ac.cn](mailto:xxwang@issas.ac.cn) (X. Wang); [m.delgadobaquerizo@gmail.com](mailto:m.delgadobaquerizo@gmail.com)  
23    (Manuel Delgado-Baquerizo)

## 24    **Supplementary Figures**

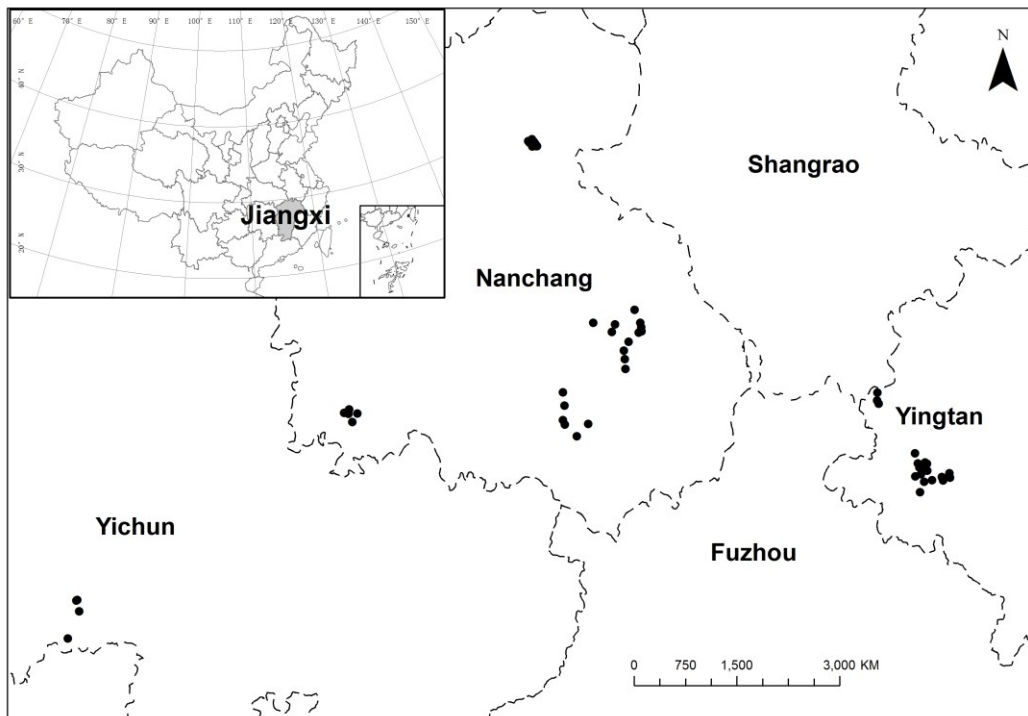

25  
26    Supplementary Figure 1. Geographical distribution of sampling fields across southeast  
27    China ( $n = 60$  study fields). Yichun, Nanchang, Fuzhou, Shangrao, and Yingtan are cities  
28    in southeast China. Dots denote the field locations of paired plant and soil sampling.

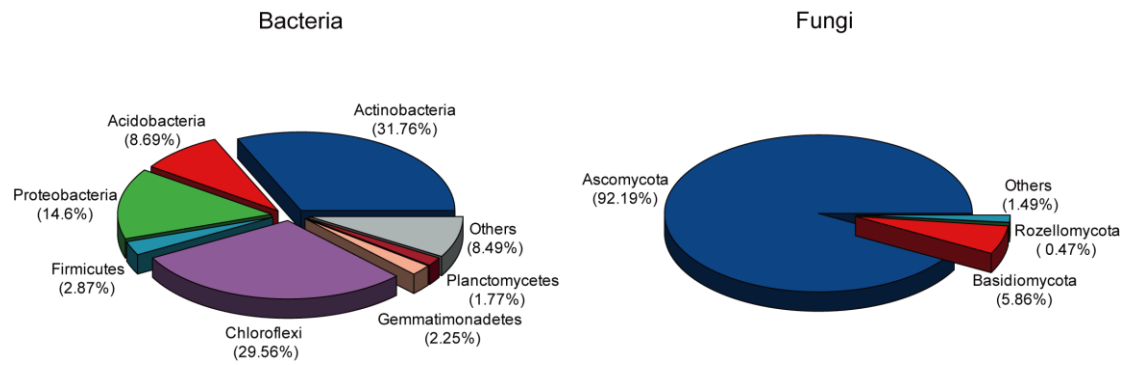

29

30 Supplementary Figure 2. Compositional traits of soil bacteria and fungi at the phylum

31 level via Illumina sequencing. Values in brackets denote the percentage of the

32 corresponding phylum.

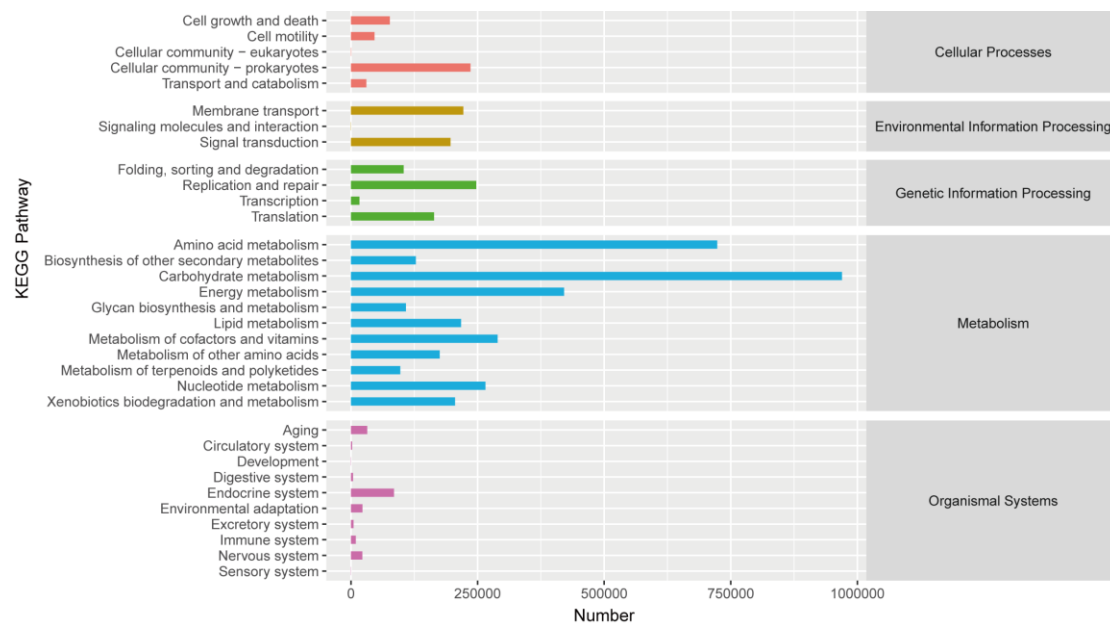

33

34 Supplementary Figure 3. Main KEGG pathways for gene functional annotation. The  
 35 horizontal coordinate represents the number of proteins annotated to the respective  
 36 metabolic pathways, while the longitudinal coordinate corresponds to various second-  
 37 level metabolic pathways in the KEGG database. The first-level classification of each  
 38 metabolic pathway is listed in the right column.

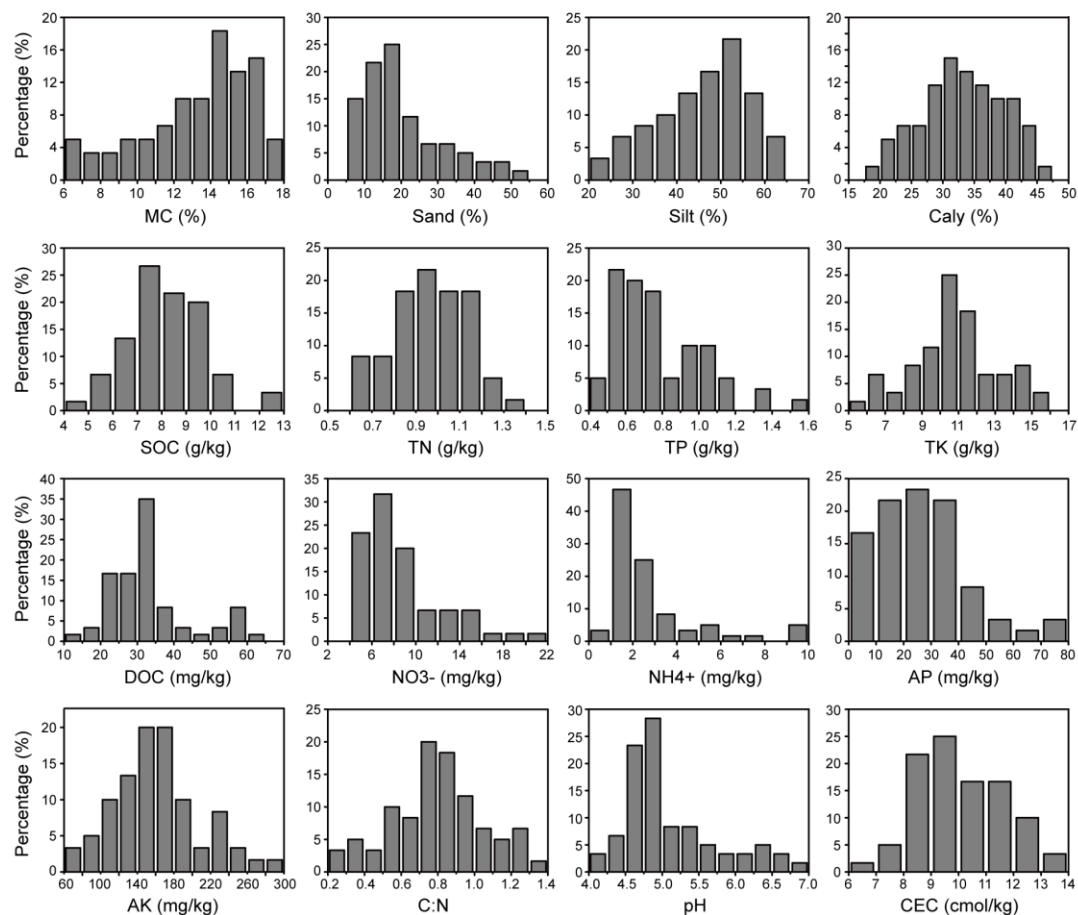

39

40 Supplementary Figure 4. Frequency distributions of soil physiochemical properties.

41 MC, moisture content; SOC, soil organic carbon; TN, total nitrogen; TP, total

42 phosphorus; TK, total potassium; DOC, soil dissolved organic carbon; NO<sub>3</sub><sup>-</sup>, nitrate;

43 NH<sub>4</sub><sup>+</sup>, ammonium; AP, available phosphorus; AK, available potassium; C:N,

44 SOC/(nitrate + ammonium); CEC, cation exchange capacity. The horizontal coordinate

45 represents the content of physicochemical factors, while the longitudinal coordinate

46 represents the percentage of samples in the total number of samples corresponding

47 to the content of the respective physicochemical factor.

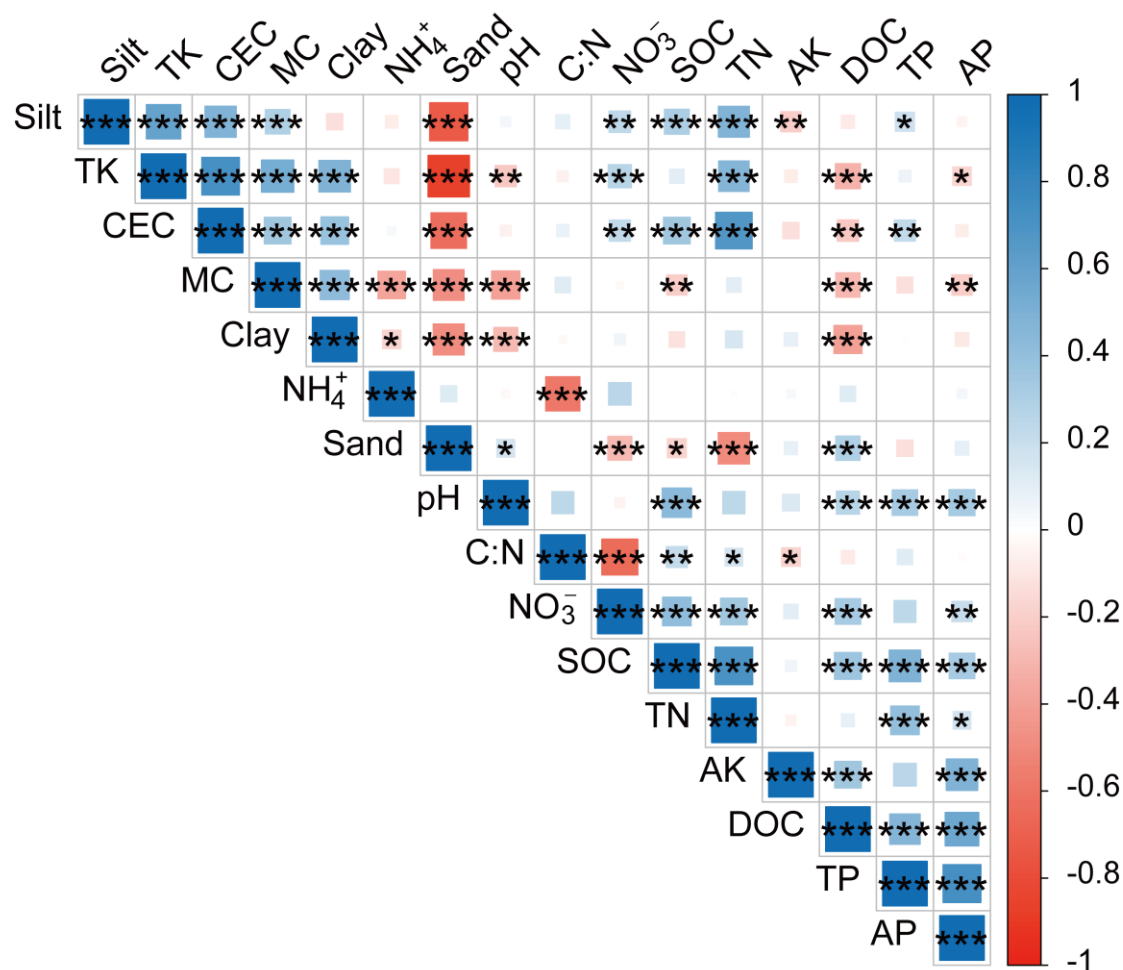

48

49 Supplementary Figure 5. Correlations among soil physiochemical properties.

50 Spearman correlations between soil physiochemical properties are noted with colored

51 squares. Blue colors indicate positive correlation, and red colors indicate negative

52 correlation. *P* values were adjusted by Benjamini–Hochberg false discovery correction

53 (\**P* < 0.05, \*\**P* < 0.01, \*\*\**P* < 0.001; *n* = 180). Information on environmental factors

54 included in the analysis can be found in Fig. S4.

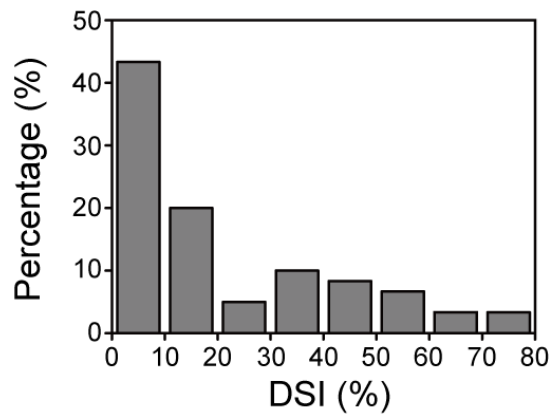

55

56 Supplementary Figure 6. Frequency distribution of disease severity index (DSI). The  
57 horizontal coordinate represents the disease severity index according to the disease  
58 severity calculation method in the Supplementary Text, while the longitudinal  
59 coordinate represents the percentage of number of surveyed fields corresponding to  
60 the DSI in the total number of fields.

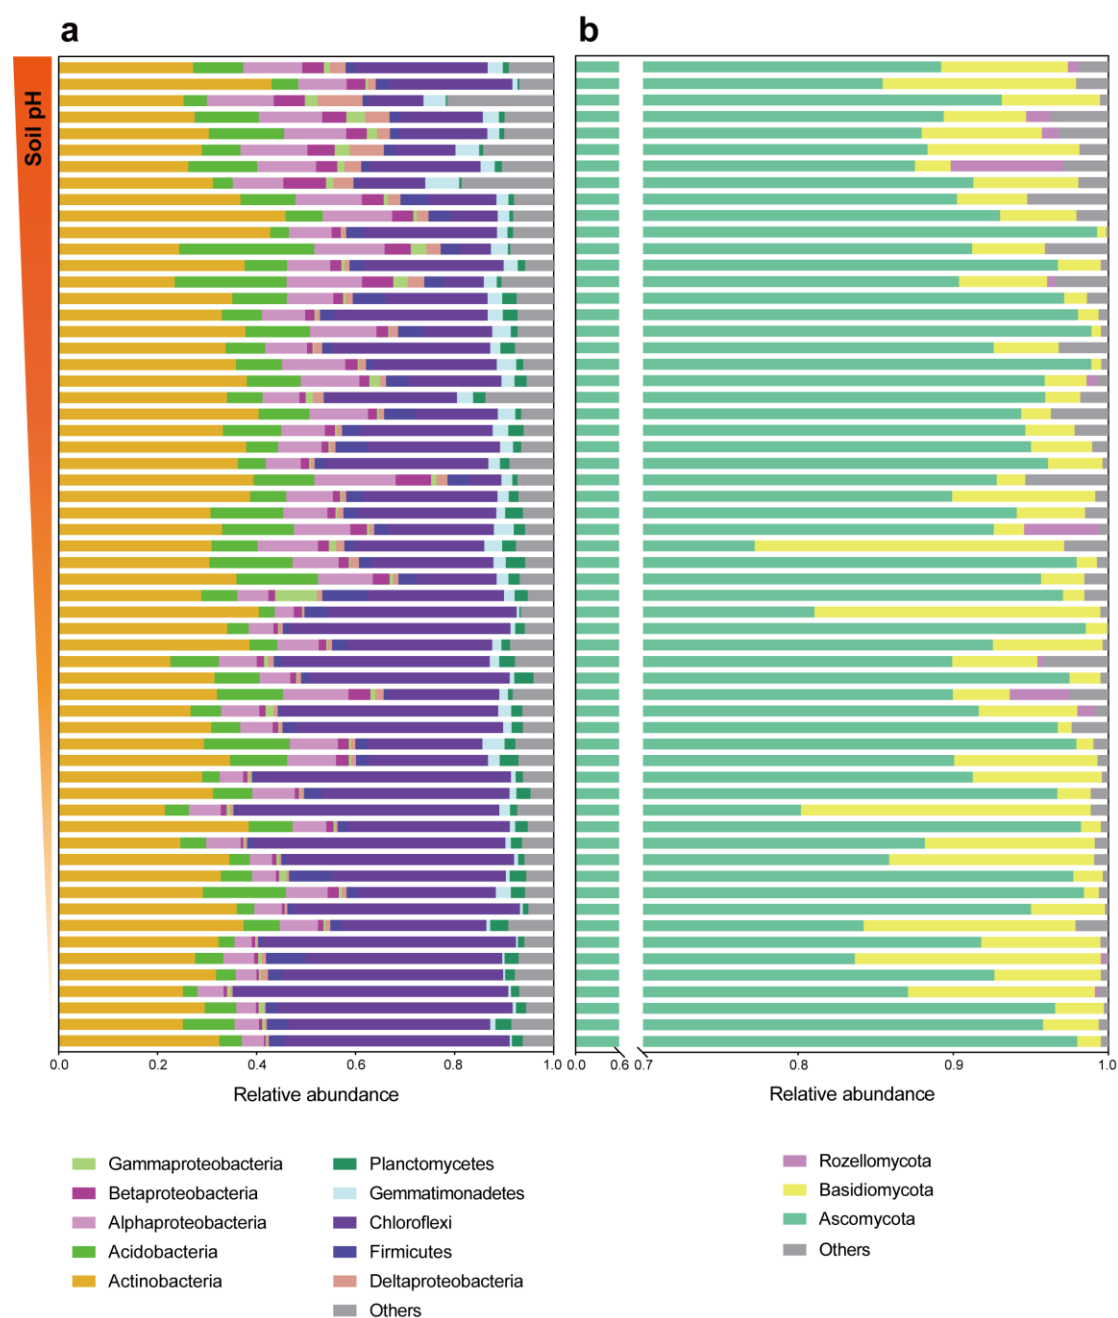

61

62 Supplementary Figure 7. Relative abundance at the phylum level of bacterial (a) and

63 fungal (b) communities from soil samples of different pH. The horizontal coordinate

64 represents the relative abundances of bacterial and fungal taxa at the phylum level,

65 while the longitudinal coordinate represents soil pH from 4 to 7 of 60 peanut fields.



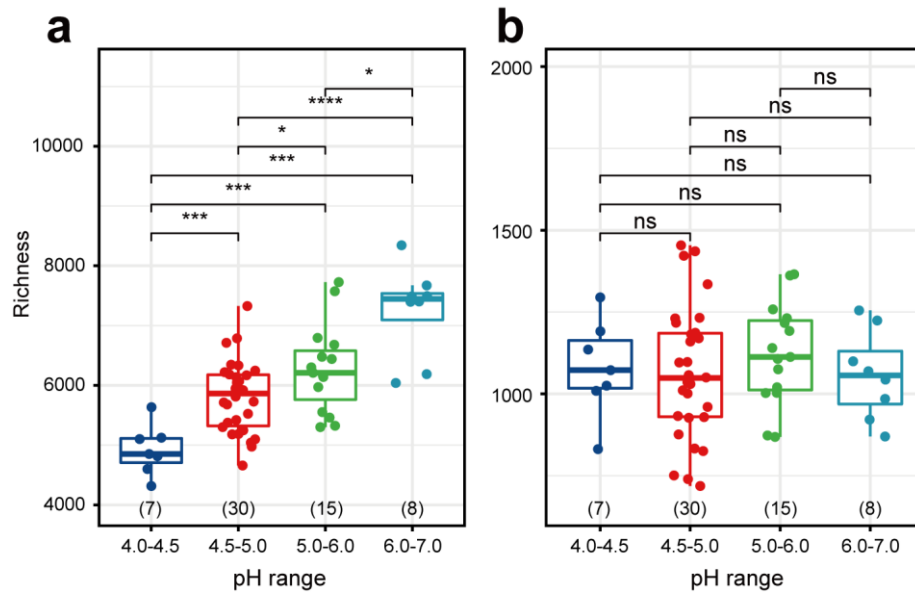

Supplementary Figure 8. Effects of soil acidification on Chao1 richness of the bacterial (a) and fungal (b) communities from soil samples of different pH ranges ( $n = 60$ ). Boxplots indicate median (box center line), 25th, 75th percentiles (box), and 5th and 95th percentiles (whiskers). Asterisks indicate significant differences as represented by the Wilcoxon test (two-sided,  $*P < 0.05$ ,  $**P < 0.01$ ,  $***P < 0.001$ ), and “ns” means not significant difference. Numbers in brackets denote the sample size in corresponding boxplot.

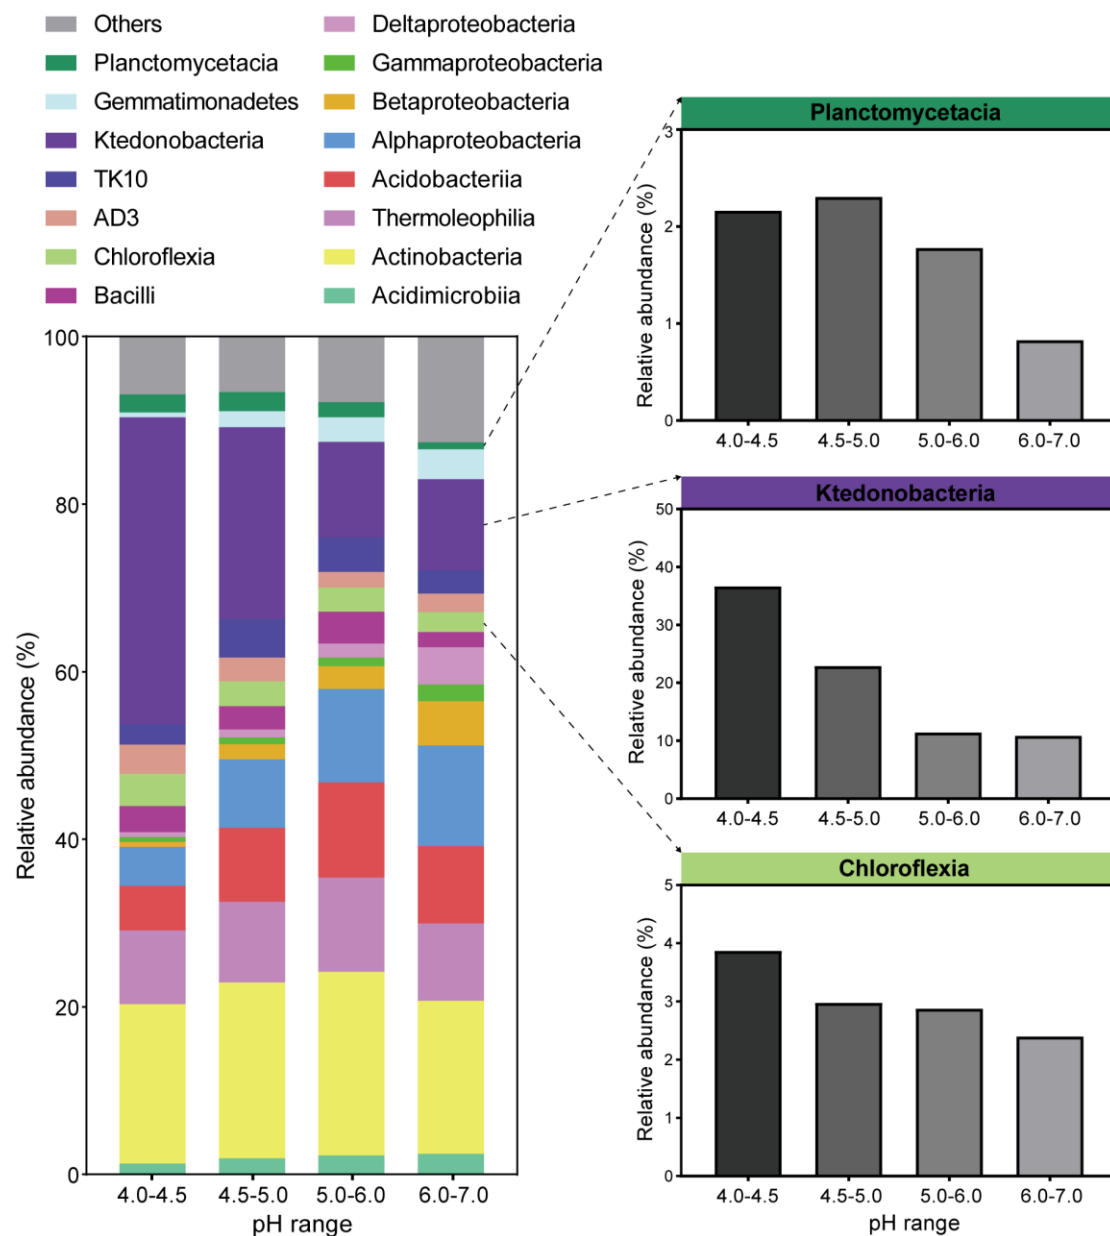

74

75 Supplementary Figure 9. Compositional traits of soil bacteria at the class level  
 76 categorized by different pH ranges. The arrows refer to the relative abundances  
 77 corresponding to the three classes, Planctomycetacia, Ktedonobacteria and  
 78 Chloroflexia, in the four pH ranges. These three highly abundant classes were enriched  
 79 under soil acidification.

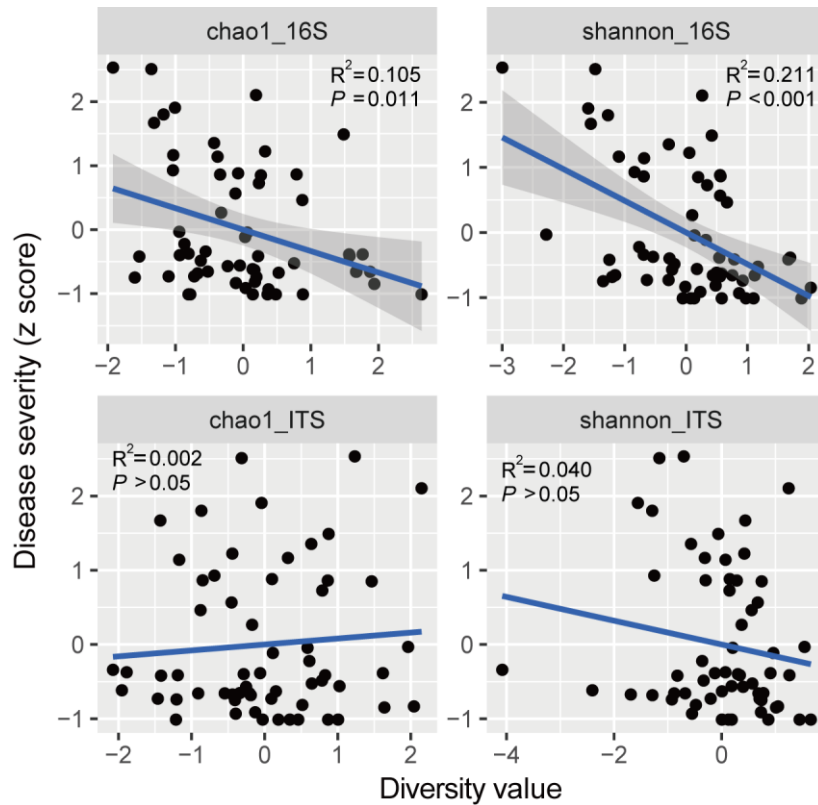

80

81 Supplementary Figure 10. Ordinary least squares linear regression between the  
 82 disease severity index and microbial diversity ( $n = 60$ ). The statistical test used is  $F$ -test  
 83 based on two-sided tests, and  $P < 0.05$  denotes the overall significance of the  
 84 regression model. The blue fitted lines are regression lines from OLS linear regression,  
 85 and the shaded areas indicate the 95% confidence interval of the regression fit.

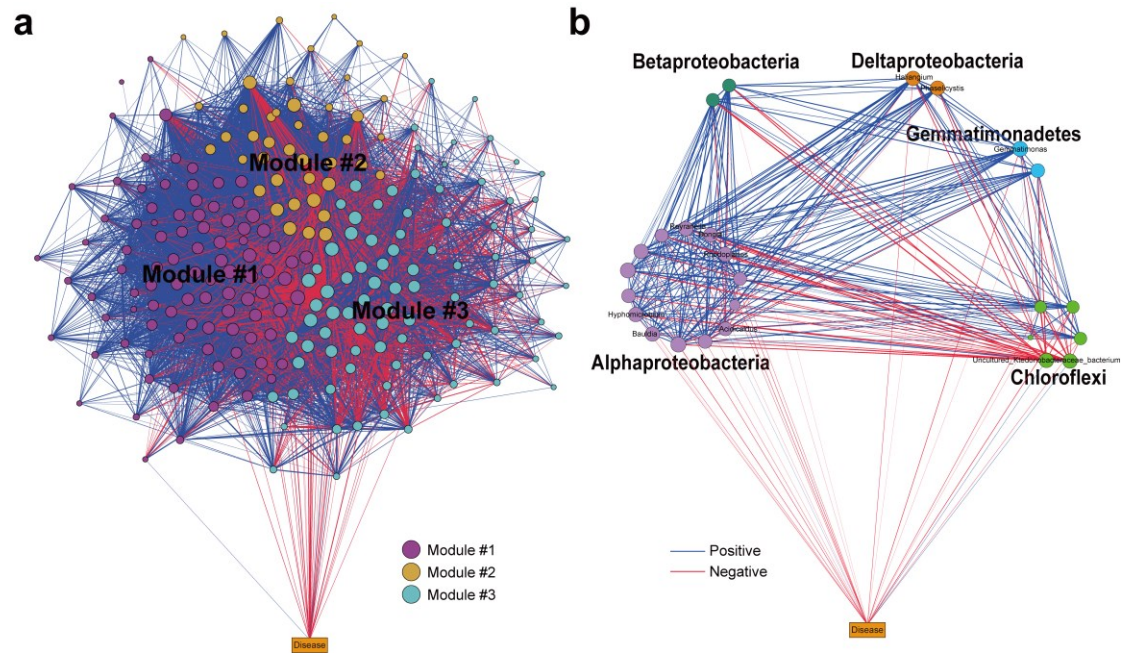

Supplementary Figure 11. Co-occurrence network and keystone taxa that reveal responses to disease severity. a Network diagram with nodes colored according to each of the three main ecological clusters (modules #1, 2 and 3). The genera within the five bacterial phyla (*i.e.*, significant predictors) among all the samples were chosen for network analysis to assess the bacterial interactive effects on disease severity. The co-occurrence patterns were constructed based on Spearman correlation matrix. Only those with a cut-off at an absolute  $r > 0.3$  and a  $P < 0.05$ , were considered statistically robust between taxa and retained. b Keystone genera that reveal significant correlations with disease severity. Among them, 13 genera in Alphaproteobacteria, 2 genera in Betaproteobacteria, 2 genera in Deltaproteobacteria, 2 genera in Gemmatimonadetes, and 4 genera in Chloroflexi were identified as negatively correlated with disease severity, whereas 1 genus in Alphaproteobacteria and 2 genera in Chloroflexi were identified as positively correlated with disease severity. The thickness of each connection between two nodes is proportional to the value of correlation coefficients.

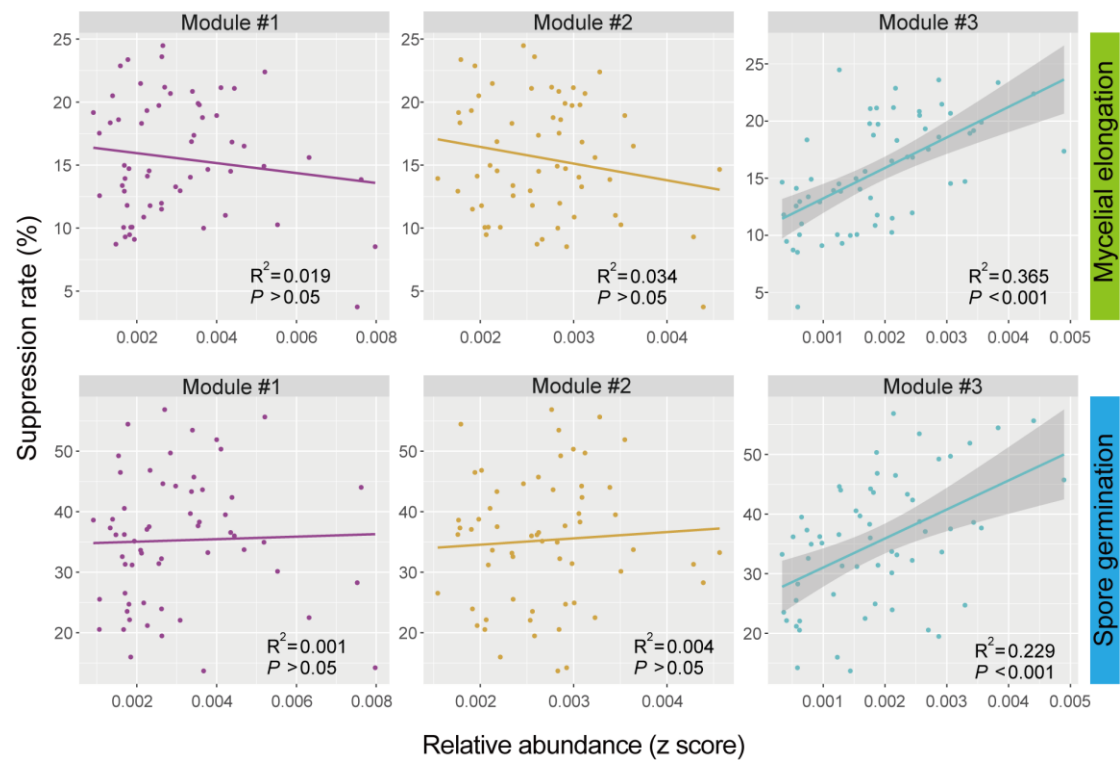

Supplementary Figure 12. Ordinary least squares linear regression between the suppression rate (%) of mycelial elongation and spore germination and the average relative abundance of the main ecological clustering modules ( $n = 60$ ). The statistical test used is  $F$ -test based on two-sided tests.  $P > 0.05$  denotes the overall not significance of the regression model, and  $P < 0.001$  denotes the overall significance of the regression model. The blue fitted lines are regression lines from OLS linear regression, and the shaded areas indicate the 95% confidence interval of the regression fit.

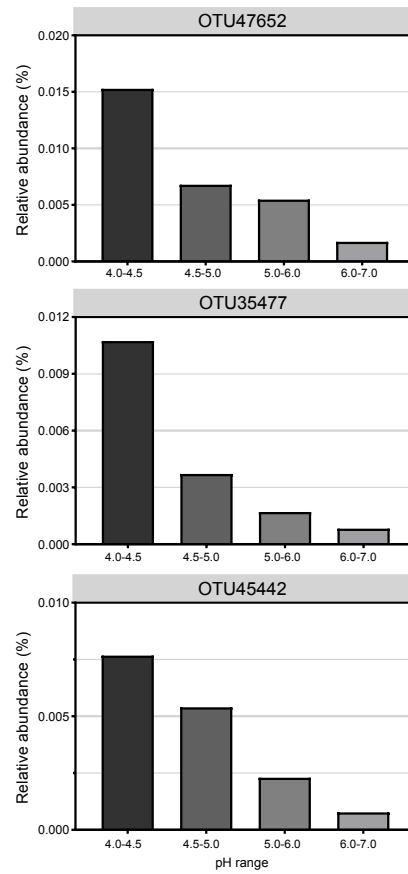

111

112 Supplementary Figure 13. Relative abundances of pathogenic fungi categorized by

113 different pH ranges via Illumina sequencing. OTU47652 belongs to *Fusarium solani*,

114 OTU35477 and OTU45442 belong to *Fusarium falciforme*.

## 115    Supplementary Tables

116    Supplementary Table 1. Primer sequences used for bacterial 16S rRNA and fungal ITS

117    high-throughput sequencing.

| Target group | Primer name and sequence (5'-3') | Reference                |
|--------------|----------------------------------|--------------------------|
| Bacteria     | F338, ACTCCTACGGGAGGCAGCA        | Derakhshani et al., 2016 |
|              | R806, GGACTACHVGGGTWTCTAAT       |                          |
| Fungi        | ITS3, GCATCGATGAAGAACGCAGC       | Orgiazzi et al., 2012    |
|              | ITS4, TCCTCCGCTTATTGATATGC       |                          |

118

119 Supplementary Table 2. Sequences of oligonucleotide primers required for  
 120 quantitative PCR.

| Target group | Primer name and sequence (5'-3')                                 | Approximate<br>size of product<br>(bp) | Annealing<br>temp (°C) | Reference              |
|--------------|------------------------------------------------------------------|----------------------------------------|------------------------|------------------------|
| Bacteria     | Eub338F, ACTCCTACGGGAGGCAGCAG<br>Eub518R, ATTACCGCGGCTGCTGG      | 200                                    | 53                     | Fierer et al.,<br>2005 |
| Fungi        | ITS1f, TCC GTA GGT GAA CCT GCG G<br>5.8s, CGC TGC GTT CTT CAT CG | 300                                    | 53                     |                        |

121



122    Supplementary Table 3. Composition of growth media used in this study.

| Media | Composition                                                                                                                                                                                                                          |
|-------|--------------------------------------------------------------------------------------------------------------------------------------------------------------------------------------------------------------------------------------|
| PDB   | Potato Dextrose (Sigma-Aldrich, St. Louis, Missouri, USA) 38 g L <sup>-1</sup>                                                                                                                                                       |
| NA    | Beef Extract (OXOID, Hampshire, England) 3 g L <sup>-1</sup> , Soybean Peptone (OXOID) 10 g L <sup>-1</sup> , Sodium Chloride (Sigma-Aldrich) 5 g L <sup>-1</sup> , Agar Powder CMN (Boom, Meppel, Netherlands) 20 g L <sup>-1</sup> |

123

124      Supplementary Table 4. Summary of the shotgun metagenomic sequencing raw data.

| Sample | Reads    | Bases (bp)  | N (%)   | GC (%) | Q20 (%) | Q30 (%) |
|--------|----------|-------------|---------|--------|---------|---------|
| A1     | 72734028 | 10982838228 | 0.00080 | 60.38  | 91.59   | 81.13   |
| A2     | 73031166 | 11027706066 | 0.00094 | 58.98  | 91.93   | 81.80   |
| A3     | 72962386 | 11017320286 | 0.00151 | 61.07  | 90.96   | 80.25   |
| A4     | 80064940 | 12089805940 | 0.00161 | 60.85  | 91.52   | 81.35   |
| B1     | 82205096 | 12412969496 | 0.00164 | 61.63  | 91.42   | 81.24   |
| B2     | 71974886 | 10868207786 | 0.00191 | 59.79  | 91.94   | 82.27   |
| B3     | 74668566 | 11274953466 | 0.00186 | 60.98  | 91.79   | 82.00   |
| B4     | 74872542 | 11305753842 | 0.00196 | 61.03  | 92.14   | 82.75   |
| C1     | 75878748 | 11457690948 | 0.00172 | 62.35  | 91.31   | 81.14   |
| C2     | 74119900 | 11192104900 | 0.00154 | 61.72  | 91.00   | 80.38   |
| C3     | 74457856 | 11243136256 | 0.00179 | 61.58  | 91.23   | 80.97   |
| C4     | 72327326 | 10921426226 | 0.00148 | 61.29  | 91.20   | 80.91   |

125      Note: A1-A4 represent soil communities at pH of 4.0-4.5; B1-B4 represent soil communities at pH of  
126      4.5-5.0; C1-C4 represent soil communities at pH of 5.0-6.0. N (%) is the proportion of fuzzy bases in the  
127      total number of bases; GC (%) is the GC content, that is, the proportion of G base and C base in the total  
128      number of bases; Q20 (%) and Q30 (%) are the proportion of bases whose determination accuracy is  
129      99% and 99.9%, respectively.

130 Supplementary Table 5. Contigs of the genome assembly via metagenomic sequencing.

| Sample | Min. sequence<br>length (bp) | Max. sequence length<br>(bp) | N50 length<br>(bp) | Sequence<br>number |
|--------|------------------------------|------------------------------|--------------------|--------------------|
| A1     | 200                          | 166785                       | 672                | 148842             |
| A2     | 200                          | 118226                       | 571                | 120715             |
| A3     | 200                          | 196856                       | 681                | 147281             |
| A4     | 200                          | 472709                       | 611                | 136881             |
| B1     | 200                          | 79032                        | 545                | 108887             |
| B2     | 200                          | 169252                       | 653                | 117582             |
| B3     | 200                          | 190028                       | 576                | 114465             |
| B4     | 200                          | 118880                       | 520                | 86558              |
| C1     | 200                          | 68387                        | 479                | 61327              |
| C2     | 200                          | 517262                       | 542                | 89173              |
| C3     | 200                          | 71629                        | 519                | 79660              |
| C4     | 200                          | 60947                        | 495                | 69514              |

131 Note: N50 length refers to the corresponding length of the last sequence when the length of the sum  
132 reaches 50% of the total length of contig sequences in order from long to short. Sequence number refers  
133 to those sequence longer than 1 kb. Information on A1-C4 can be found in Table S4.

134 Supplementary Table 6. Mantel test results of soil properties on bacterial and fungal  
135 communities.

|                              | Community dissimilarity |        |
|------------------------------|-------------------------|--------|
|                              | Bacteria                | Fungi  |
| pH                           | 0.419***                | -0.020 |
| MC                           | 0.160*                  | 0.012  |
| SOC                          | 0.338***                | -0.036 |
| DOC                          | -0.041                  | -0.005 |
| TN                           | 0.128*                  | 0.018  |
| NO <sub>3</sub> <sup>-</sup> | 0.105*                  | 0.005  |
| NH <sub>4</sub> <sup>+</sup> | 0.042                   | -0.018 |
| C:N                          | 0.028                   | 0.022  |
| TP                           | -0.014                  | 0.021  |
| AP                           | -0.042                  | -0.031 |
| TK                           | -0.053                  | 0.067  |
| AK                           | -0.118                  | -0.041 |
| CEC                          | -0.048                  | 0.028  |
| Sand                         | -0.065                  | 0.010  |
| Silt                         | 0.098*                  | -0.005 |
| Clay                         | 0.271***                | -0.038 |

136 Abbreviations: MC, moisture content (%); SOC, soil organic carbon (g kg<sup>-1</sup>); DOC, dissolved organic  
137 carbon (mg kg<sup>-1</sup>); TN, total nitrogen (g kg<sup>-1</sup>); NO<sub>3</sub><sup>-</sup>, soil nitrate (mg kg<sup>-1</sup>); NH<sub>4</sub><sup>+</sup>, soil ammonium (mg kg<sup>-1</sup>);  
138 C:N, carbon to nitrogen ratio; TP, total phosphorus (g kg<sup>-1</sup>); AP, available phosphorus (mg kg<sup>-1</sup>); TK, total  
139 potassium (g kg<sup>-1</sup>); AK, available potassium (mg kg<sup>-1</sup>); CEC, cation exchange capacity (cmol kg<sup>-1</sup>). The  
140 statistical tests are two-sided, and significant effects are indicated by \*\*\*  $P < 0.001$ , \*\*  $P < 0.01$ , \*  $P <$   
141 0.05.

Supplementary Table 7. Comparison of the relative abundances of the dominant taxa among different pH ranges. Values are means (SD). Values at the same rows followed by different letters differed significantly at  $P < 0.05$  based on Duncan's multiple comparisons test.

| Bacteria/Phylum level | pH           |              |              |              |
|-----------------------|--------------|--------------|--------------|--------------|
|                       | 4.0-4.5      | 4.5-5.0      | 5.0-6.0      | 6.0-7.0      |
| Actinobacteria        | 0.29(0.03)b  | 0.33(0.05)ab | 0.35(0.06)a  | 0.30(0.06)b  |
| Acidobacteria         | 0.05(0.03)b  | 0.09(0.04)ab | 0.11(0.06)a  | 0.09(0.04)ab |
| Alphaproteobacteria   | 0.05(0.01)c  | 0.08(0.03)b  | 0.11(0.03)a  | 0.12(0.01)a  |
| Betaproteobacteria    | 0.01(0.00)c  | 0.02(0.01)b  | 0.03(0.02)b  | 0.05(0.02)a  |
| Gammaproteobacteria   | 0.01(0.00)b  | 0.01(0.01)b  | 0.01(0.01)ab | 0.02(0.01)a  |
| Deltaproteobacteria   | 0.01(0.00)c  | 0.01(0.00)bc | 0.02(0.01)b  | 0.04(0.02)a  |
| Firmicutes            | 0.03(0.03)ab | 0.03(0.02)ab | 0.04(0.02)a  | 0.02(0.02)b  |
| Chloroflexi           | 0.46(0.06)a  | 0.33(0.11)b  | 0.20(0.08)c  | 0.18(0.06)c  |
| Gemmatimonadetes      | 0.01(0.00)c  | 0.02(0.01)b  | 0.03(0.01)a  | 0.04(0.02)a  |
| Planctomycetes        | 0.02(0.01)a  | 0.02(0.01)a  | 0.02(0.01)a  | 0.01(0.00)b  |
| Others                | 0.07(0.01)b  | 0.07(0.01)b  | 0.08(0.02)b  | 0.13(0.05)a  |

| Fungi/Phylum level | pH            |                |               |               |
|--------------------|---------------|----------------|---------------|---------------|
|                    | 4.0-4.5       | 4.5-5.0        | 5.0-6.0       | 6.0-7.0       |
| Ascomycota         | 0.92(0.05)ab  | 0.92(0.06)ab   | 0.95(0.03)a   | 0.89(0.02)b   |
| Basidiomycota      | 0.07(0.05)a   | 0.06(0.06)ab   | 0.03(0.02)b   | 0.07(0.03)a   |
| Rozellomycota      | 0.001(0.001)b | 0.003(0.011)ab | 0.001(0.002)b | 0.013(0.025)a |
| Others             | 0.004(0.002)b | 0.013(0.012)ab | 0.020(0.016)a | 0.023(0.010)a |

148 Supplementary Table 8. Bacterial and fungal biomarkers sensitive to disease severity revealed by co-occurrence analysis.

| Genus                                         | Family                     | Order            | Class               | Phylum           |
|-----------------------------------------------|----------------------------|------------------|---------------------|------------------|
| <i>Gemmatimonas</i>                           | Gemmatimonadaceae          | Gemmatimonadales | Gemmatimonadetes    | Gemmatimonadetes |
| <i>Uncultured_Gemmatimonadaceae_bacterium</i> | Gemmatimonadaceae          | Gemmatimonadales | Gemmatimonadetes    | Gemmatimonadetes |
| <i>Acidicaldus</i>                            | Acetobacteraceae           | Acetobacterales  | Alphaproteobacteria | Proteobacteria   |
| <i>Dongia</i>                                 | Dongiaceae                 | Dongiales        | Alphaproteobacteria | Proteobacteria   |
| <i>Uncultured_Elsteraceae_bacterium</i>       | Elsteraceae                | Elsterales       | Alphaproteobacteria | Proteobacteria   |
| <i>Uncultured_Micropepsaceae_bacterium</i>    | Micropepsaceae             | Micropepsales    | Alphaproteobacteria | Proteobacteria   |
| <i>Reyranella</i>                             | Reyranellaceae             | Reyranellales    | Alphaproteobacteria | Proteobacteria   |
| <i>Unidentified_Devosiaceae_bacterium</i>     | Devosiaceae                | Rhizobiales      | Alphaproteobacteria | Proteobacteria   |
| <i>Hyphomicrobium</i>                         | Hyphomicrobiaceae          | Rhizobiales      | Alphaproteobacteria | Proteobacteria   |
| <i>Pedomicrobium</i>                          | Hyphomicrobiaceae          | Rhizobiales      | Alphaproteobacteria | Proteobacteria   |
| <i>Bauldia</i>                                | Rhizobiales_Incertae_Sedis | Rhizobiales      | Alphaproteobacteria | Proteobacteria   |
| <i>Nordella</i>                               | Rhizobiales_Incertae_Sedis | Rhizobiales      | Alphaproteobacteria | Proteobacteria   |
| <i>Bradyrhizobium</i>                         | Xanthobacteraceae          | Rhizobiales      | Alphaproteobacteria | Proteobacteria   |
| <i>Rhodoplanes</i>                            | Xanthobacteraceae          | Rhizobiales      | Alphaproteobacteria | Proteobacteria   |

| Genus                                           | Family               | Order                 | Class               | Phylum         |
|-------------------------------------------------|----------------------|-----------------------|---------------------|----------------|
| <i>Uncultured_Xanthobacteraceae_bacterium</i>   | Xanthobacteraceae    | Rhizobiales           | Alphaproteobacteria | Proteobacteria |
| <i>Unidentified_Xanthobacteraceae_bacterium</i> | Xanthobacteraceae    | Rhizobiales           | Alphaproteobacteria | Proteobacteria |
| <i>Ellin6067</i>                                | Nitrosomonadaceae    | Betaproteobacteriales | Betaproteobacteria  | Proteobacteria |
| <i>Uncultured_SC-I-84_bacterium</i>             | SC-I-84              | Betaproteobacteriales | Betaproteobacteria  | Proteobacteria |
| <i>Haliangium</i>                               | Haliangiaceae        | Myxococcales          | Deltaproteobacteria | Proteobacteria |
| <i>Phaselicystis</i>                            | Phaselicystidaceae   | Myxococcales          | Deltaproteobacteria | Proteobacteria |
| <i>Uncultured_C0119_bacterium</i>               | Uncultured_bacterium | C0119                 | Ktedonobacteria     | Chloroflexi    |
| <i>1921-3</i>                                   | Ktedonobacteraceae   | Ktedonobacterales     | Ktedonobacteria     | Chloroflexi    |
| <i>Uncultured_Ktedonobacteraceae_bacterium</i>  | Ktedonobacteraceae   | Ktedonobacterales     | Ktedonobacteria     | Chloroflexi    |
| <i>Uncultured_A4b_bacterium</i>                 | A4b                  | SBR1031               | Anaerolineae        | Chloroflexi    |
| <i>Uncultured_Roseiflexaceae_bacterium</i>      | Roseiflexaceae       | Chloroflexales        | Chloroflexia        | Chloroflexi    |
| <i>Uncultured_KD4-96_bacterium</i>              | Uncultured_bacterium | Uncultured_bacterium  | KD4-96              | Chloroflexi    |

149 Note: Those genera in bold were recognized as the keystone taxa based on the highest degree, highest closeness centrality, and lowest betweenness centrality in the network  
150 (Banerjee et al., 2018).

151 Supplementary Table 9. Role of key taxa contributing to disease severity based on  
 152 Spearman's correlation.

| Genus                                           | r     |
|-------------------------------------------------|-------|
| <i>Gemmatimonas</i>                             | -0.47 |
| <i>Uncultured_Gemmatimonadaceae_bacterium</i>   | -0.31 |
| <i>Acidicaldus</i>                              | 0.33  |
| <i>Dongia</i>                                   | -0.41 |
| <i>Uncultured_Elsteraceae_bacterium</i>         | -0.36 |
| <i>Uncultured_Micropepsaceae_bacterium</i>      | -0.37 |
| <i>Reyranella</i>                               | -0.32 |
| <i>Unidentified_Devesiaceae_bacterium</i>       | -0.36 |
| <i>Hyphomicrobium</i>                           | -0.38 |
| <i>Pedomicrobium</i>                            | -0.40 |
| <i>Bauldia</i>                                  | -0.30 |
| <i>Nordella</i>                                 | -0.35 |
| <i>Bradyrhizobium</i>                           | -0.33 |
| <i>Rhodoplanes</i>                              | -0.41 |
| <i>Uncultured_Xanthobacteraceae_bacterium</i>   | -0.35 |
| <i>Unidentified_Xanthobacteraceae_bacterium</i> | -0.34 |
| <i>Ellin6067</i>                                | -0.31 |
| <i>Uncultured_SC-I-84_bacterium</i>             | -0.32 |
| <i>Haliangium</i>                               | -0.44 |
| <i>Phaselicystis</i>                            | -0.31 |
| <i>Uncultured_C0119_bacterium</i>               | -0.32 |
| <i>1921-3</i>                                   | 0.35  |
| <i>Uncultured_Ktedonobacteraceae_bacterium</i>  | 0.34  |
| <i>Uncultured_A4b_bacterium</i>                 | -0.36 |
| <i>Uncultured_Roseiflexaceae_bacterium</i>      | -0.40 |
| <i>Uncultured_KD4-96_bacterium</i>              | -0.48 |

153



154    Supplementary Table 10. Topological properties of co-occurring bacterial network.

| Topological properties           | Original network <sup>a</sup> | Simplified network <sup>b</sup> |
|----------------------------------|-------------------------------|---------------------------------|
| Number of nodes                  | 246                           | 27                              |
| Number of edges                  | 10900                         | 318                             |
| Numbers of positive correlations | 8649                          | 230                             |
| Numbers of negative correlations | 2251                          | 88                              |
| Average path length              | 1.701                         | 1.094                           |
| Graph density                    | 0.359                         | 0.906                           |
| Network diameter                 | 4                             | 2                               |
| Average clustering coefficient   | 0.671                         | 0.938                           |
| Average degrees                  | 88.259                        | 23.556                          |
| Modularity                       | 0.151                         | 0.048                           |

155    a. The original network refers to the co-occurrence network in Fig. S11a.

156    b. The simplified network refers to the co-occurrence network in Fig. S11b.

157 Supplementary Table 11. Summary of the clean dataset after screening and filtering  
 158 via metagenomic sequencing.

| Sample | HQ Data (bp) | HQ Data (%) | HQ Reads (%) |
|--------|--------------|-------------|--------------|
| A1     | 9932474518   | 90.44       | 97.31        |
| A2     | 10019150422  | 90.85       | 97.42        |
| A3     | 9867841588   | 89.57       | 97.30        |
| A4     | 10923377380  | 90.35       | 97.56        |
| B1     | 11193605113  | 90.18       | 97.39        |
| B2     | 9852857895   | 90.66       | 97.59        |
| B3     | 10206336507  | 90.52       | 97.51        |
| B4     | 10280452897  | 90.93       | 97.66        |
| C1     | 10296894679  | 89.87       | 97.37        |
| C2     | 10023144461  | 89.56       | 97.25        |
| C3     | 10095082166  | 89.79       | 97.28        |
| C4     | 9806651014   | 89.79       | 97.31        |

159 Note: HQ Data (bp) refers to the total number of bases of high-quality sequences; HQ Data (%) refers to  
 160 the proportion of the total number of bases of high-quality sequence in the total number of bases of  
 161 the raw sequence. HQ Reads (%) refers to the proportion of the number of high-quality sequences in  
 162 the original number of raw sequences. Information on A1-C4 can be found in Table S4.

163 Supplementary Table 12. Identified volatile compounds produced by bacterial  
164 communities.

| Compound                                 | <i>RT</i> | pH 4.0-4.5 | pH 4.5-5.0 | pH 5.0-6.0 |
|------------------------------------------|-----------|------------|------------|------------|
| <b>Dimethyl sulfide</b>                  | 2.65      | 9.31       | 7.78       | 6.96       |
| Trichloromethane                         | 3.06      | 13.83      | ND         | ND         |
| <b>Dimethyl disulfide</b>                | 3.77      | 0.68       | 30.58      | 31.23      |
| Allomatrine                              | 3.79      | 4.12       | ND         | ND         |
| 3-Methylenecyclohexene                   | 4.28      | 0.69       | ND         | ND         |
| 6-Methylchromone-2-carboxylic acid       | 4.34      | 0.55       | ND         | ND         |
| <b>Dimethyl sulfoxide (DMSO)</b>         | 5.59      | 0.59       | 0.57       | 0.39       |
| <b>Tiaprude</b>                          | 5.64      | ND         | ND         | 0.40       |
| 1,3-dimethyl benzene                     | 6.04      | 3.99       | ND         | 1.24       |
| Ethylbenzene                             | 6.05      | ND         | 1.94       | 0.54       |
| Bicyclo[4.2.0]octa-1,3,5-triene          | 6.68      | 30.50      | ND         | ND         |
| Styrene                                  | 6.69      | ND         | 24.89      | 23.03      |
| 2,2,4,6,6-pentamethyl heptane            | 8.92      | 0.62       | ND         | ND         |
| Octamethyl cyclotetrasiloxane            | 9.03      | 1.34       | 0.51       | 0.43       |
| 4-Methyl cycloheptanone                  | 9.19      | ND         | ND         | 1.59       |
| 1-Methyl-2-(4-methylpentyl) cyclopentane | 9.23      | 1.58       | ND         | ND         |
| 2,5-Dimethylcyclohexanone                | 9.58      | ND         | 3.21       | 0.73       |
| o-Cymene                                 | 9.67      | ND         | 1.44       | 0.99       |
| 1-Methyl-2-(1-methylethyl)-Benzene       | 9.71      | 2.12       | ND         | ND         |
| 2,4,4,6,6,8,8-Heptamethyl-1-nonene       | 10.35     | 0.80       | ND         | ND         |
| 2-Methyl-1-undecanol                     | 11.06     | ND         | ND         | 3.93       |
| 2-Nonanone                               | 11.07     | ND         | 3.63       | ND         |
| 1-Methyl-4-(1-methylethenyl)-Benzene     | 11.08     | 0.66       | ND         | ND         |
| Decamethyl cyclopentasiloxane            | 12.31     | 1.15       | 5.37       | 6.68       |

| Compound                           | <i>RT</i> | pH 4.0-4.5 | pH 4.5-5.0 | pH 5.0-6.0 |
|------------------------------------|-----------|------------|------------|------------|
| Dodecamethyl cyclohexasiloxane     | 15.61     | 10.85      | 9.35       | 10.18      |
| Tetradecamethyl cycloheptasiloxane | 18.59     | 6.26       | 4.18       | 4.50       |
| Hexadecamethyl cyclooctasiloxane   | 21.19     | 2.58       | 1.86       | 1.83       |
| Octadecamethyl cyclononasiloxane   | 23.28     | 1.02       | 1.17       | 1.11       |

165 Note: Shown are those volatiles that were emitted from the bacterial communities extracted from soils  
 166 with pH of 4.0-4.5, 4.5-5.0, and 5.0-6.0, excluding volatiles that were also present in the controls.  
 167 Compounds were identified based on retention index and mass spectra. Those volatiles in bold were  
 168 recognized as sulfurous volatile compounds produced by bacterial communities. RT: retention time. ND:  
 169 not detected.
